# Supplementary material for: Flow-through PCR on a 3D qiandu-shaped polydimethylsiloxane (PDMS) microdevice employing a single heater: toward microscale multiplex PCR
Source: Royal Society of Chemistry journal article supplement (doi:10.1039/c2an35077g), 2012-01-01
Supplement: c2an35077g.pdf [file c2an35077g.pdf]

## Electronic Supplementary Information

# Flow-through PCR on a 3D qiandu-shaped polydimethylsiloxane (PDMS) microdevice employing a single heater: Toward microscale multiplex PCR

*Wenming Wu,<sup>a</sup> Kieu The Loan Trinh<sup>b</sup> and Nae Yoon Lee<sup>\*b</sup>*

Gachon BioNano Research Institute, Gachon University, 1342 Seongnam-daero,  
Sujeong-gu, Seongnam-si, Gyeonggi-do, 461-701, Korea

Division of BioNano Technology and College of BioNano Technology, Gachon  
University, 1342 Seongnam-daero, Sujeong-gu, Seongnam-si, Gyeonggi-do, 461-701,  
Korea

**Temperature stabilization tendencies observed on the slanted surface of the qiandu-shaped PDMS microdevice**

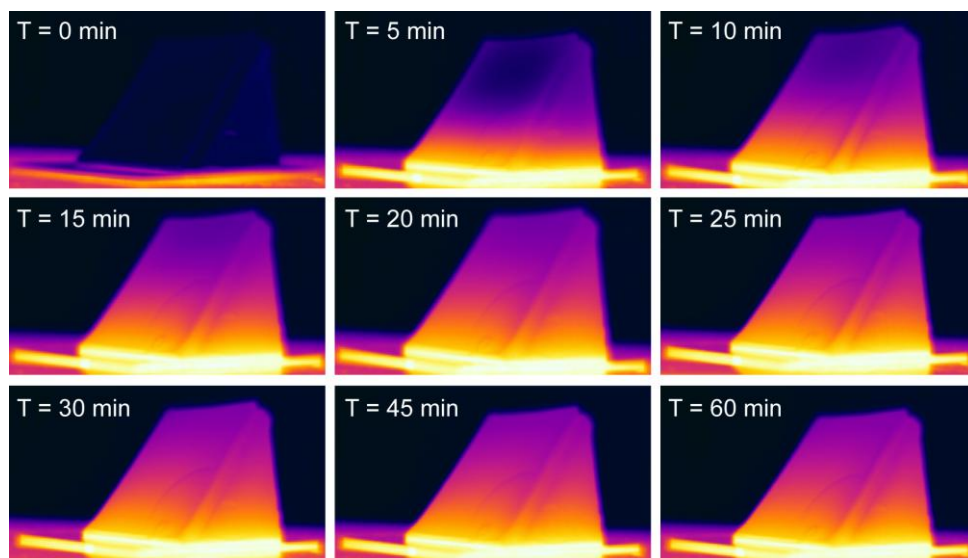

**Fig. S1.** Time-dependent temperature stabilization tendencies observed on the slanted surface of the qiandu-shaped PDMS microdevice over 1 h time course using the IR camera.

### Some formulas for the calculation of the optimum $T_m$ values

The sequences of the primers used in this study are as follows.

- Forward primer: 5'-CCG GCG AAC GTG GCG AGA AAG GAA GGG AAG AAA GC-3' (35-mer)
- Reverse primer: 5'-TCG CCT TGC AGC ACA TCC CCC TTT CGC CAG C-3' (31-mer)

**For longer (> 14 bases) primers, the following two formulas were used.**

#### i) Basic $T_m$ calculation

$$T_m = 64.9^\circ\text{C} + 41^\circ\text{C} \times (\text{number of G's and C's in the primer} - 16.4)/N \quad (N: \text{length of the primer})$$

Forward: 15G & 6C (N = 35)

Reverse: 5G & 15C (N = 31)

Therefore,

$$T_m (\text{forward}) = 64.9 + 41 \times (21-16.4)/35 = 70.3^\circ\text{C}$$

$$T_m (\text{reverse}) = 64.9 + 41 \times (20-16.4)/35 = 69.1^\circ\text{C}$$

#### ii) Salt-assisted $T_m$ calculation (References [1] ~ [2])

$$T_m = 81.5^\circ\text{C} + 16.6^\circ\text{C} \times (\log_{10}[\text{Na}^+] + [\text{K}^+]) + 0.41^\circ\text{C} \times (\% \text{ GC}) - 675/N$$

Forward: GC 60% (N = 35)

Reverse: GC 64% (N = 31)

$[\text{Na}^+] = 0.05 \text{ M}$  (for both cases)

Therefore,

$$T_m (\text{forward}) = 81.5 + 16.6 \times (\log_{10}[0.05]) + 0.41(60) - 675/35 = 65.2^\circ\text{C}$$

$$T_m (\text{reverse}) = 81.5 + 16.6 \times (\log_{10}[0.05]) + 0.41(64) - 675/31 = 64.6^\circ\text{C}$$

→ Although the resulting  $T_m$  values obtained in methods i) and ii) were slightly different, the differences were within the ranges of  $\pm 5^\circ\text{C}$ .

#### References

- [1] W. Rychlik, R. E. Rhoads, *Nucleic Acids Res.* 1989, **17**, 8543-8551.
- [2] J. Sambrook, E. F. Fritsch, T. Maniatis, *Molecular Cloning: A Laboratory Manual*. Cold Spring Harbor Laboratory Press, Cold Spring Harbor 1989.

## Comparison of target amplicon intensity under varying amplification conditions

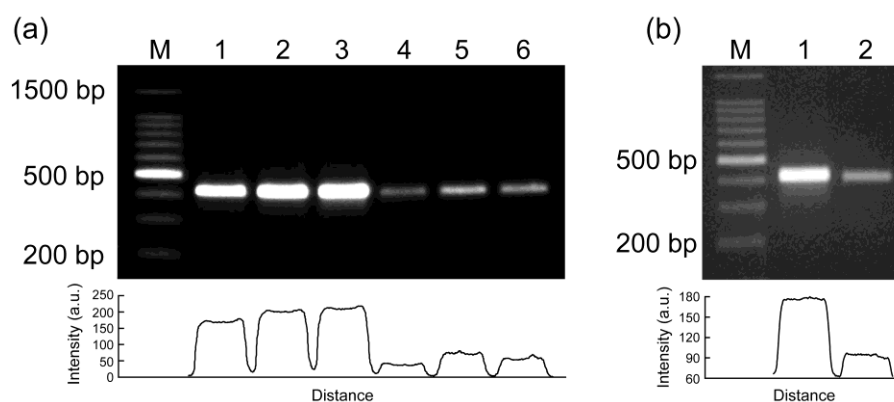

**Fig. S2.** Amplification results of 409 bp gene fragments. (a) Lanes 1 – 3 represent typical three-temperature PCR results with 30 – 40 s of residence time at each temperature regime, when annealing temperatures were 55.0, 57.0, and 60.0 °C, respectively. Lanes 4 – 6 represent two-temperature PCR results with no residence time, when annealing/extension temperatures were 55.0, 57.0, and 60.0 °C. (b) Lane 1 represents two-temperature PCR results with 30 s of residence time at each temperature regime. Lane 2 represents two-temperature PCR with no residence time. Annealing/extension temperatures were set to 57.0 °C for both cases. M is a 100 bp DNA size marker. Relative intensity scales of the target amplicons were shown below the gel image.

## Thermocycler-based gradient multiplex PCR

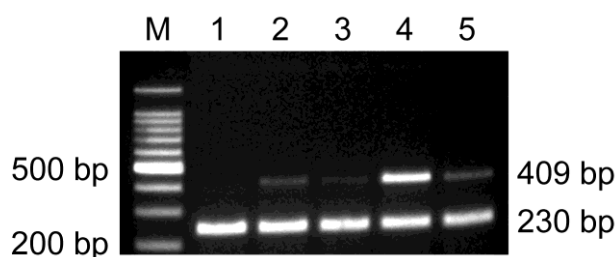

**Fig. S3.** Result of a gradient PCR employing two templates simultaneously using a thermocycler. Two-temperature PCR was performed with no residence time at each temperature regime. Lanes 1 – 5 represent multiplex PCR results when the annealing/extension temperatures were 51.0, 53.0, 55.0, 57.0, and 59.0 °C, respectively.
